# Supplementary material for: A biomimetic dual-targeting nanomedicine for pancreatic cancer therapy
Source: Royal Society of Chemistry journal article supplement (doi:10.1039/d4tb02206h), 2025-01-01
Supplement: d4tb02206h1.pdf [file d4tb02206h1.pdf]

1 **Supplementary information**

2

3 **A Biomimetic Dual-Targeting Nanomedicine for Pancreatic Cancer**  
4 **Therapy**

5

6

7 Guihua Zhou<sup>a,b,c</sup>, Yuan Zhang<sup>e</sup>, Zhiwei Cai<sup>a</sup>, Hongfei Yao<sup>a</sup>, Meng Liu<sup>a</sup>, Chongyi  
8 Jiang<sup>a\*</sup>, Zhen Cheng<sup>c, d\*</sup>

9

10 *<sup>a</sup>Department of General Surgery, Huadong Hospital, Fudan University, Shanghai*  
11 *200040, China*

12 *<sup>b</sup>Department of Hepatobiliary Pancreatic Surgery, Changhai Hospital, Naval Medical*  
13 *University, Shanghai 200433, China*

14 *<sup>c</sup>State Key Laboratory of Drug Research, Molecular Imaging Center, Shanghai*  
15 *Institute of Materia Medica, Chinese Academy of Sciences, Shanghai 201203, China*

16 *<sup>d</sup>Shandong Laboratory of Yantai Drug Discovery, Bohai Rim Advanced Research*  
17 *Institute for Drug Discovery, Yantai, Shandong 264117, China*

18 *<sup>e</sup>Department of General Surgery, Shanghai Ren-ai Hospital, Shanghai 200235, China*  
19

20 **\*Corresponding author**

21 Chongyi Jiang, Email: [jiangzhongyi9@126.com](mailto:jiangzhongyi9@126.com)

22 Zhen Cheng, Email: [zcheng@simm.ac.cn](mailto:zcheng@simm.ac.cn)

23

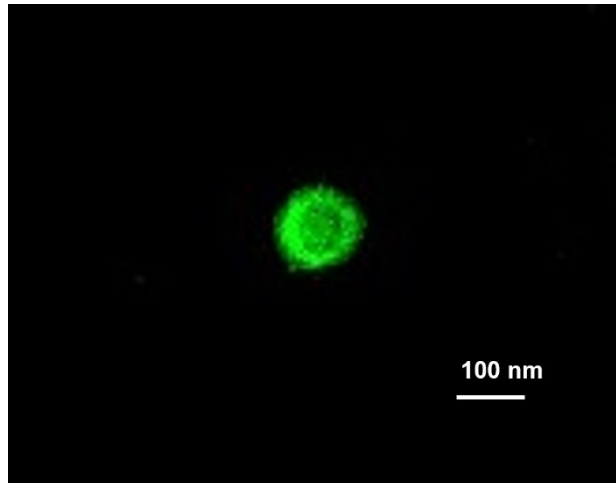

24

25 **Fig. S1** Immunofluorescence staining of fibroblast activation protein- $\alpha$  (FAP- $\alpha$ ) on the CAFM of  
26 (Lo+FeCO) $\text{@}$ MPDA $\text{@}$ CAFM nanoparticles.

27

28

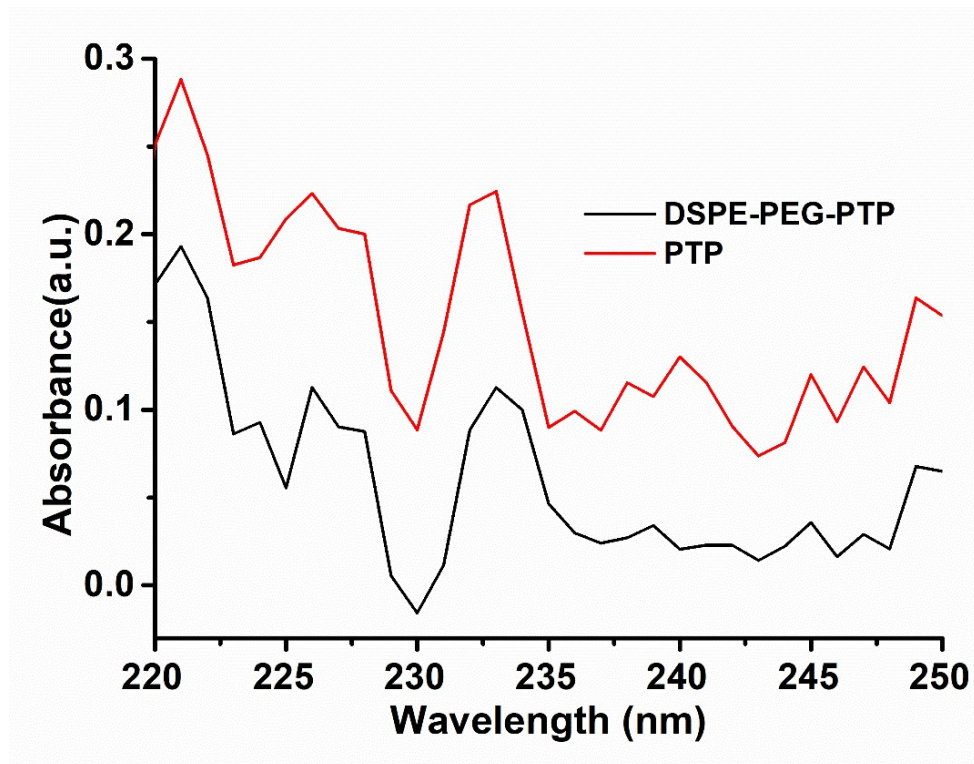

29

30 **Fig. S2** UV-Vis absorption spectra of PTP and DSPE-PEG-PTP.

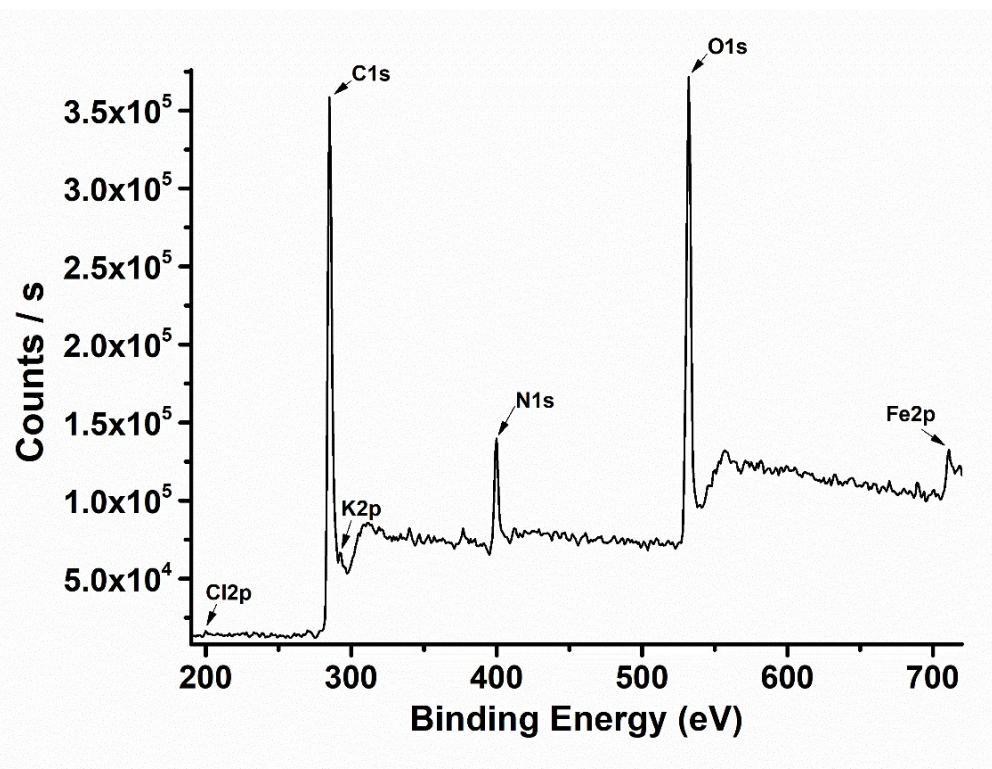

31

32 **Fig. S3** X-ray Photoelectron Spectroscopy (XPS) analysis of (Lo+FeCO)@MPDA@CAFMs-PTP

33 nanomedicine.

34

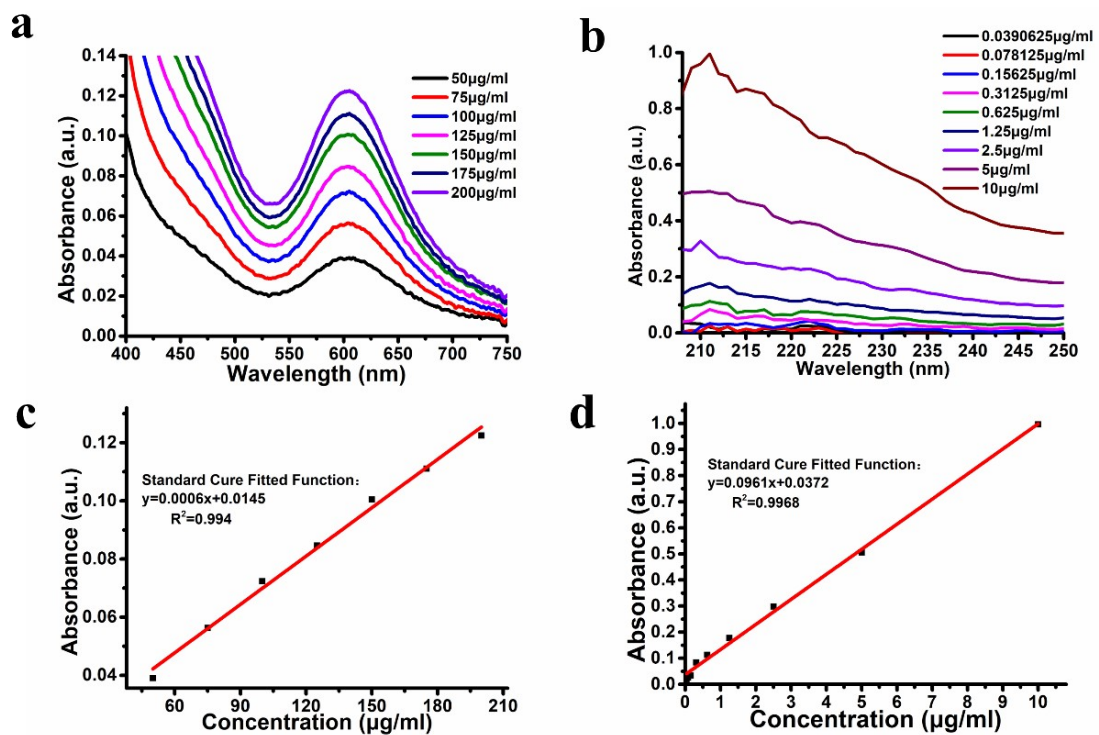

35

36 **Fig. S4** UV-vis absorption spectra of different concentrations of FeCO (a) and Lo (b). Linear

37 correlation equation and standard curve between UV-vis absorption intensities and the

38 concentration of FeCO (c) and Lo (d).

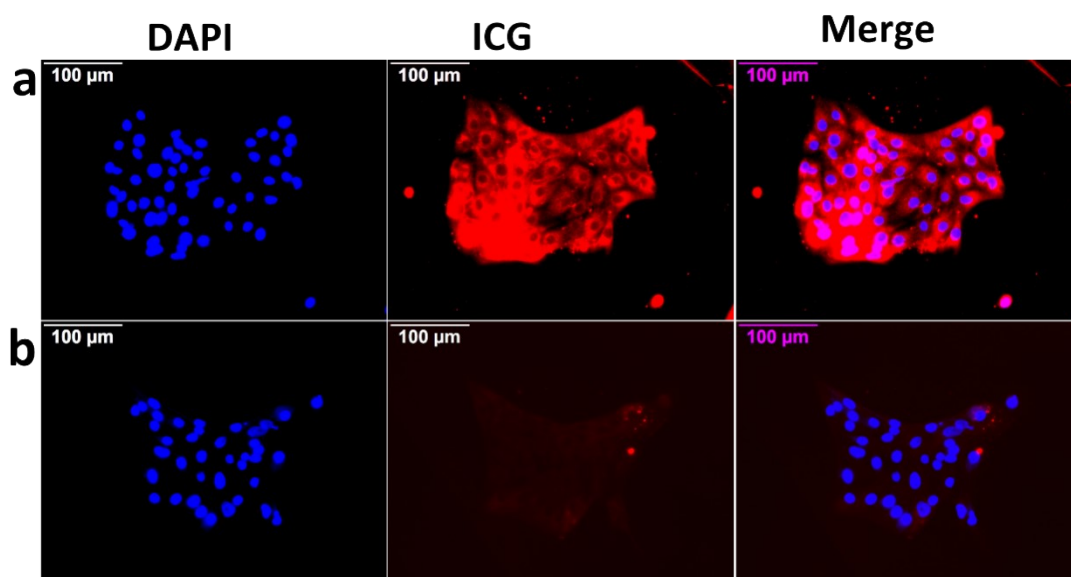

39

40 **Fig. S5** Fluorescence images of Panc-1 cells treated with ICG-labeled  
 41 (Lo+FeCO)<sub>2</sub>@MPDA@CAF<sub>2</sub>M-PTP nanomedicine, in the absence (a) or presence (b) of plectin-1  
 42 antibody.

43

44

45

46

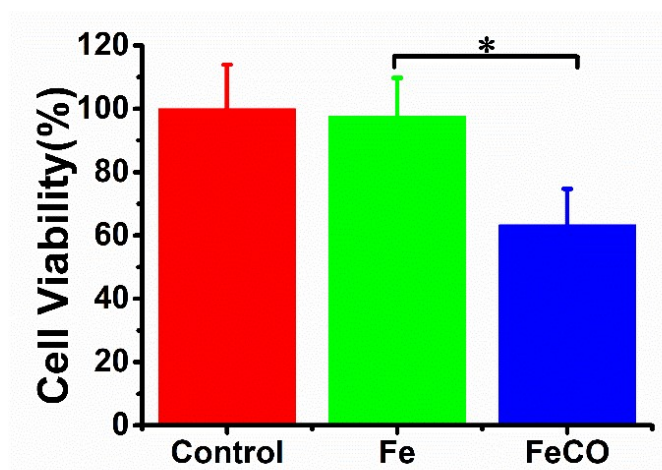

47

48 **Fig. S6** Viability of Panc-1 cells co-cultured with FeCO or iron ions (Fe).

49



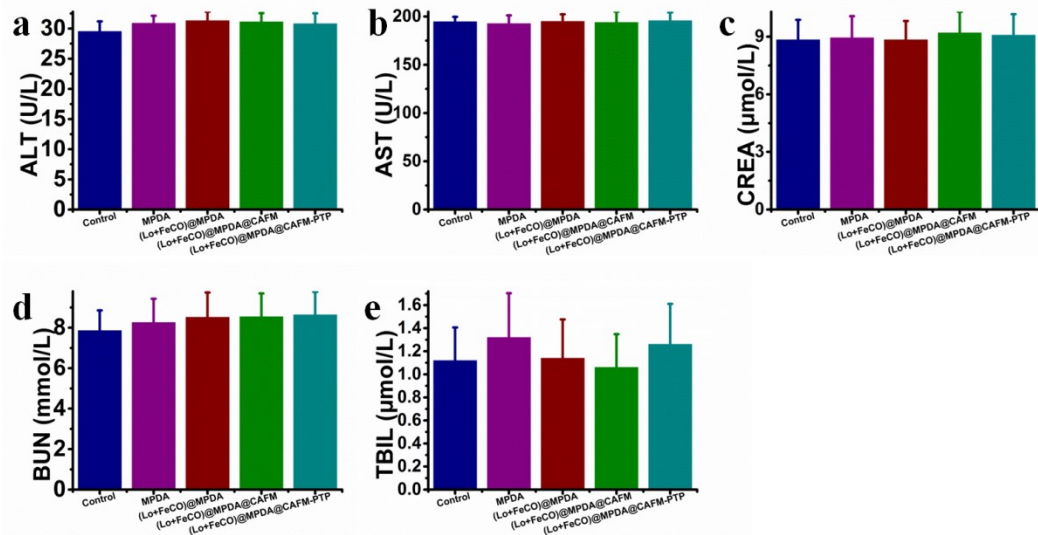

50

51 **Fig. S7** Analysis of hepatic and renal function in mice following treatment with different drug  
 52 formulations, based on blood biochemical assays. (a) ALT, (b) AST, (c) CREA, (d) BUN, (e)  
 53 TBIL.

54

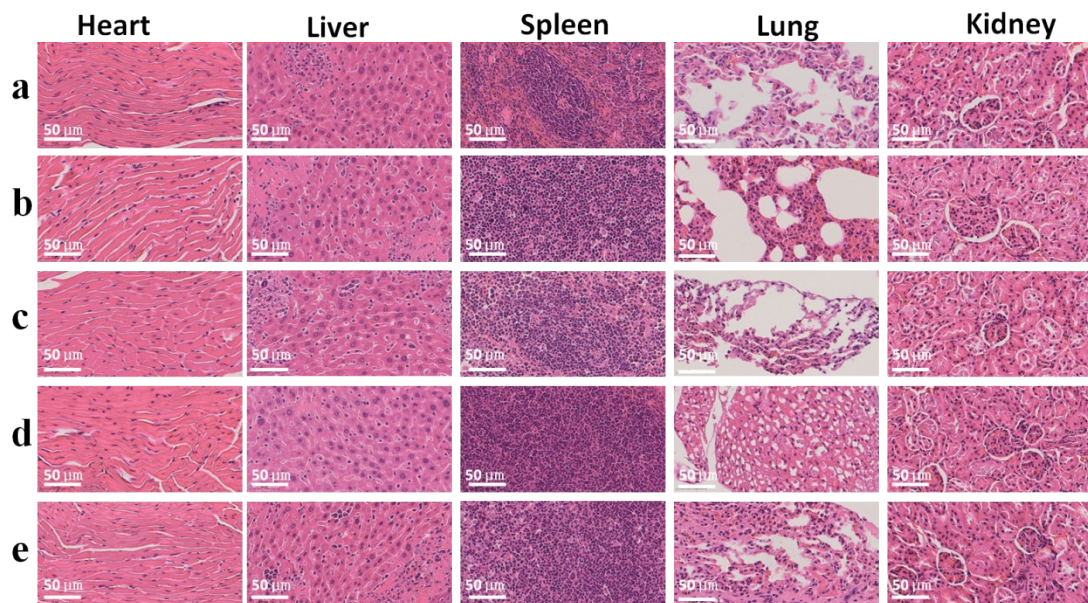

55

56 **Fig. S8** H&E staining of major organs from PC tumor-bearing mice treated with PBS as the  
 57 control (a), MPDA (b), (Lo+FeCO)@MPDA (c), (Lo+FeCO)@MPDA@CAFM (d), and  
 58 (Lo+FeCO)@MPDA@CAFM-PTP (e) nanoparticles.

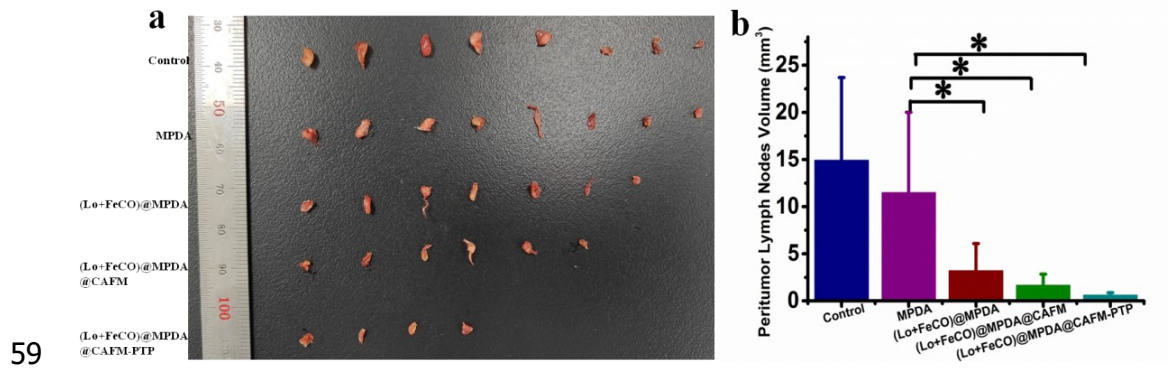

59

60 **Fig. S9** (a) Images of excised peritumoral lymph nodes following treatment with different drug  
 61 formulations. (b) Mean volume of peritumoral lymph nodes across different treatment groups.  
 62 Data are presented as mean  $\pm$  standard deviation (SD) (n = 5). Statistical significance is indicated  
 63 by an asterisk (\*p < 0.05).  
 64

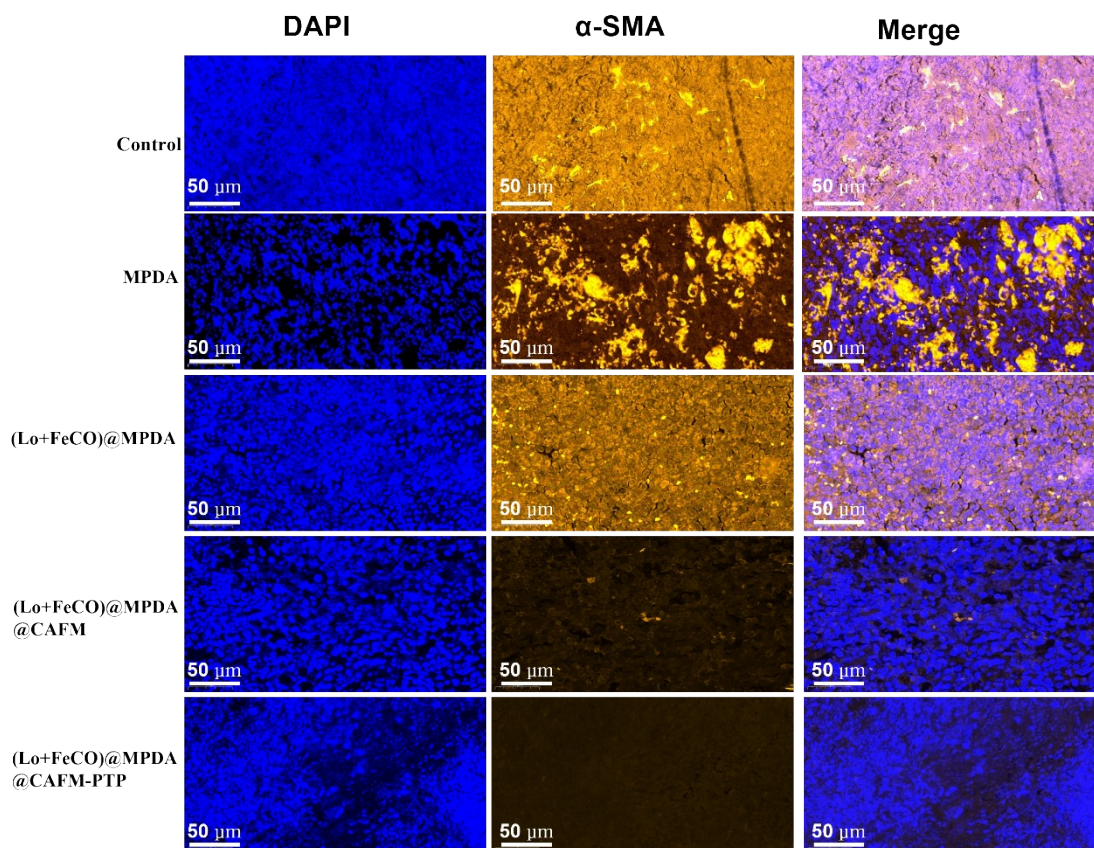

65

66 **Fig. S10** Immunohistofluorescence staining of  $\alpha$ -SMA of tumor slices after treatment with PBS as  
 67 a control, MPDA, (Lo+FeCO)<sub>2</sub>@MPDA, (Lo+FeCO)<sub>2</sub>@MPDA@CAF<sub>2</sub>M, and  
 68 (Lo+FeCO)<sub>2</sub>@MPDA@CAF<sub>2</sub>M-PTP nanoparticles.

69

70

71

72

73

74

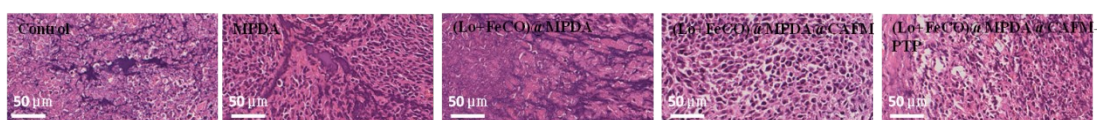

75

76 **Fig. S11** Extracellular matrix assay by tumor histopathological slices after treatment with different  
 77 drug formulations.

78

79 **Table S1.** The Polydispersity Index (PDI) values of MPDA, (Lo+FeCO)@MPDA, and  
80 (Lo+FeCO)@MPDA@CAFM-PTP nanoparticles.

| Nanoparticles           | Polydispersity Index (PDI) |
|-------------------------|----------------------------|
| MPDA                    | 0.054±0.004                |
| (Lo+FeCO)@MPDA          | 0.048±0.004                |
| (Lo+FeCO)@MPDA@CAFM-PTP | 0.045±0.006                |

81 Data are presented as mean  $\pm$  standard deviation (SD) (n = 6).

82



83 **Table S2** Key hematological indices of mice in the control group and those treated with  
84 (Lo+FeCO)<sub>2</sub>@MPDA@CAF<sub>2</sub>M-PTP nanomedicine.

| Hematological indexes     | Control       | (Lo+FeCO) <sub>2</sub> @MPDA@CAF <sub>2</sub> M-PTP |
|---------------------------|---------------|-----------------------------------------------------|
| WBC (10 <sup>9</sup> /L)  | 5.13±1.67     | 5.79±1.87                                           |
| RBC (10 <sup>12</sup> /L) | 9.89±1.57     | 9.57±1.46                                           |
| HGB (g/L)                 | 141.22±13.74  | 145.83±15.88                                        |
| PLT (10 <sup>9</sup> /L)  | 989.71±219.66 | 987.89±214.39                                       |

85 **Abbreviations:** white blood cells (WBC), red blood cells (RBC), hemoglobin (HGB), platelet (PLT). Data are  
86 presented as mean ± standard deviation (SD) (n = 5).
